# Supplementary material for: How the forest interacts with the trees: Multiscale shape integration explains global and local processing
Source: PubMed Central journal article supplement — J Vis. 2020 Oct 27;20(10):20. doi: 10.1167/jov.20.10.20 (PMC7594584; doi:10.1167/jov.20.10.20), 2020-10-27
Supplement: jovi-20-10-20_s001.pdf [file jovi-20-10-20_s001.pdf]

**SUPPLEMENTARY MATERIAL**  
for

**“How the forest interacts with the trees: Multiscale shape integration explains global and local processing” by Georgin Jacob & SP Arun**

**CONTENTS**

**SECTION S1. STATISTICAL ANALYSES (EXPT 1)**

**SECTION S2. RT CONSISTENCY & RELATIONS (EXPT 1)**

**SECTION S3. DISTINCTIVENESS ANALYSES (EXPT 1)**

**SECTION S4. STATISTICAL ANALYSES (EXPT 2)**

**SECTION S5. VISUALIZATION OF SEARCH SPACE (EXPT 2)**

**SECTION S6. COMPARISON WITH OTHER MODELS (EXPT 2)**

**SECTION S7. SIMPLIFYING HIERARCHICAL STIMULI (EXPT S1)**

**SECTION S8. ELEMENT SIZE, POSITION & NUMBER (EXPT S2)**

**SECTION S9. CHANGING ELEMENT POSITION (EXPT S3)**

**SECTION S10. CHANGING ELEMENT GROUPING (EXPT S4)**

**SECTION S11. SUPPLEMENTARY REFERENCES**

## SECTION S1: STATISTICAL ANALYSES FOR EXPERIMENT 1

---

The rationale for using linear mixed effects modelling over the traditional ANOVAs is detailed in the main text. Here we describe the basic LMM framework and include detailed statistical reports for each of the analyses described in the main text.

### METHODS

**Software.** We used the R programming language version 3.6.3 with R studio version 1.3.959 for all statistical analyses. We used the *lme4* package (Baayen et al., 2008; Bates et al., 2015) for Linear Mixed Modelling. Since the *lme4* package does not output statistical significance, we used the *lmerTest* package (Kuznetsova et al., 2017) and *Car* package (Fox and Weisberg, 2018). We report the partial eta-squared ( $\eta_p^2$ ) as a measure of effect size since it can be compared across experiments (Richardson, 2011; Lakens, 2013). We used the *effectsize* package to calculate partial eta-squared from a Linear Mixed Model. For graphical summaries of the data we used *fitdistrplus*, *ggplot*, *mass* and *ggpubr* R packages (Venables and Ripley, 2002; Wickham, 2009; Delignette-Muller and Dutang, 2015).

**Linear Mixed effects Model.** The basic LMM model for the GDL pairs was specified in the R environment as `Model = lmer(y~Block*ImagePair +(1|Subject), contrast = list(Block = 'contr.sum', ImagePair = 'contr.sum'), data = <data>, REML =False)`, where *y* is either the response time or inverse response time, which specifies that the responses are driven by main and interaction effects of Block and Image pair, with Participant as a random intercept factor (which specifies that it introduces unknown random shifts from each participant).

Since the residuals of the LMM models with inverse reaction times as dependent variable were normally distributed in most of the analyses (Distributions of residuals of 9 out of 15 LMM models used in this study are not significantly deviating from normal distribution tested using Kolmogorov-smirnov test), we additionally used an ANOVA (*anova* function in R) to obtain the F-statistic and significance values.

### RESULTS

For the GDL pairs in the global and local blocks, we had data from 16 participants who made 2 responses for each of 147 image pairs, and we are interested in knowing whether responses are systematically different between the global and local blocks.

To investigate the validity of the assumptions underlying the LMM, we fit the LMM model on both RT and 1/RT to GDL pairs, with blocks (global/local) and image pairs (147 levels) as fixed factors and participants as a random intercept factor. The residual errors of the LMM model are depicted in Figure S1. It can be seen that both the distribution and cumulative distribution of residual error deviate strongly from normal in the case of RT (Figure S1A), whereas the residual errors are much closer to the expected normal distribution for 1/RT based residuals (Figure S1B).

A

### Linear Mixed Model on RT data

$$RT \sim \text{Block} * \text{Image Pairs} + (1|\text{Subject})$$

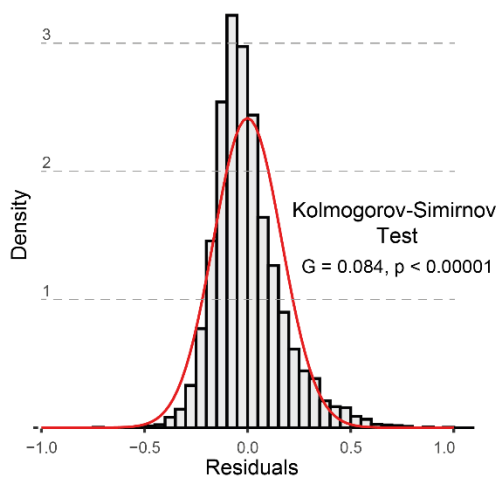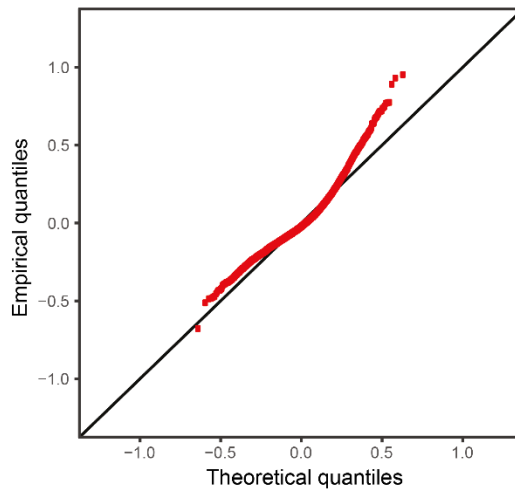

B

### Linear Mixed Model on inverse of RT data

$$RT^{-1} \sim \text{Block} * \text{Image Pairs} + (1|\text{Subject})$$

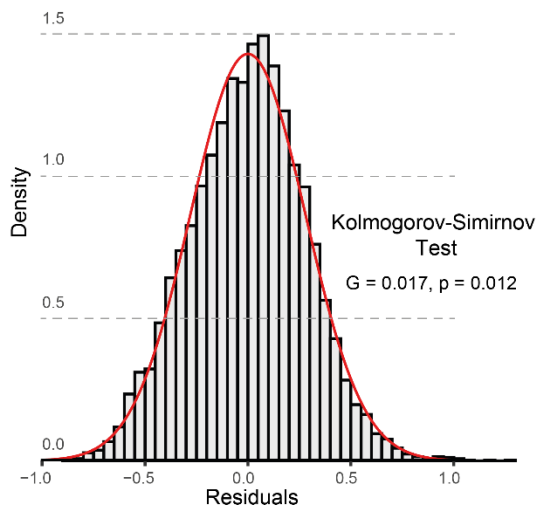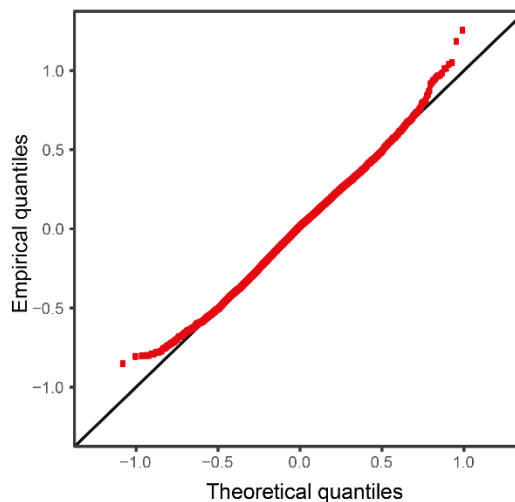

48

49

### Figure S1. Distribution of residual errors for LMMs using RT and 1/RT

50

(A) *Left*: Histogram of residuals of an LMM model on RT data (GSLD pairs). This LMM has two fixed factors (blocks and image-pairs) and one random intercept factor (subjects). The red curve shows the normally distribution with the same mean and standard deviation as the residuals. *Right*: QQ plot of the residuals of the observed data plotted against that expected from a normal distribution.

51

52

53

54

55

(B) Same as (A) but for the LMM fit to the 1/RT data.

56

57

### Comparison of statistical test results for RT vs 1/RT ANOVA & LMM models

58

59

60

61

62

As an illustrative example, we performed both repeated measures ANOVA as well as linear mixed effects model (LMM) on RT and 1/RT measures in the GDLG pairs in the global and local blocks. It can be seen that the LMM results yield stronger effect sizes with higher statistical significance, since it is based on using raw data, as opposed to the average data used for the repeated measures ANOVA. Further, using

63 1/RT in the analyses produced stronger effect sizes and higher statistical significance  
 64 compared to RT-based analyses.  
 65

| Name of model                                                                 | Name of effect            | Results on RT |             | Results on 1/RT |             |
|-------------------------------------------------------------------------------|---------------------------|---------------|-------------|-----------------|-------------|
|                                                                               |                           | F-stat        | p-value     | F-stat          | p-value     |
| Repeated measures ANOVA on averages Block*Imgpair + (Subject (Block*Imgpair)) | Block, F(1,15)            | 5.22          | p < 0.05    | 4.36            | p = 0.0543  |
|                                                                               | Image Pairs F(146,2190)   | 2.94          | p < 0.00005 | 3.94            | p < 0.00005 |
|                                                                               | Interaction, F(146, 2190) | 1.62          | p < 0.00005 | 1.96            | p < 0.00005 |
| Linear mixed model (Block*Imagepair) + (1 Subject)                            | Block, F(1,8602)          | 124.24        | p < 0.00005 | <b>97.75</b>    | p < 0.00005 |
|                                                                               | Image Pairs, F(146, 8602) | 8.28          | p < 0.00005 | <b>7.53</b>     | p < 0.00005 |
|                                                                               | Interaction, F(146, 8602) | 4.92          | p < 0.00005 | <b>3.59</b>     | p < 0.00005 |

66 **Table S1. Comparison of various statistical models applied on RT & 1/RT.** In each  
 67 case, the F-statistic and p-value is reported for RT and 1/RT data. The linear mixed  
 68 model on 1/RT was adjudged as the best model (highlighted in **bold**) since its residuals  
 69 were closest to the theoretically expected normal distribution. In most cases, it also  
 70 yielded larger F-values and higher statistical significance as well.

71

72 **Global advantage for GDLD pairs**

73 For GDLD pairs we modelled blocks (global/local) and image pairs (147 levels)  
 74 as fixed factors with participants as a random intercept factor (see Methods). This  
 75 revealed a significant main effect of blocks ( $F(1,8602) = 97.75$ ;  $p < 0.00005$ ;  $\eta_p^2 = 0.01$ )  
 76 and image pairs ( $F(146, 8602) = 7.53$ ;  $p < 0.00005$ ;  $\eta_p^2 = 0.11$ ) and an interaction  
 77 between blocks and image pairs ( $F(146,8602) = 3.58$ ;  $p < 0.00005$ ;  $\eta_p^2 = 0.06$ ). A post-  
 78 hoc analysis revealed that 97 of 147 (66%) image pairs had faster responses in the  
 79 global block on GSLS pairs, suggesting that the interaction largely modified the  
 80 magnitude but not the presence of the global advantage effect.

81

82 **Global advantage for GSLS pairs**

83 For the GSLS pairs, a similar analysis revealed a main effect of block  
 84 ( $F(1,8647) = 413.06$ ;  $p < 0.00005$ ;  $\eta_p^2 = 0.05$ ) and image pairs ( $F(48,8647) = 8.95$ ;  
 85  $p < 0.00005$ ;  $\eta_p^2 = 0.05$ ) and an interaction between blocks and image pairs ( $F(48,8647)$   
 86  $= 6.53$ ;  $p < 0.00005$ ;  $\eta_p^2 = 0.03$ ). A post-hoc analysis revealed that 44 of 49 (90%) image  
 87 pairs had faster responses in the global block on GDLD pairs, suggesting that the  
 88 interaction largely modified the magnitude but not the presence of the global  
 89 advantage effect.

90

91 **Local-to-global interference for GSLS vs GSLD pairs in global block**

92 Since there is no direct correspondence between the GSLS and GSLD pairs,  
 93 we performed a linear mixed effects model analysis on inverse response times with  
 94 interference (GSLS vs GSLD) as a fixed factor and participants as a random intercept  
 95 factor. This revealed a main effect of interference ( $F(1, 8772) = 433.18$ ;  
 96  $p < 0.00005$ ;  $\eta_p^2 = 0.05$ ).

97

98 **Global-to-local interference for GSLS vs GDLS pairs in local block**

99 As before, we performed a linear mixed effects model analysis on inverse  
 100 response times with interference (GSLS vs GDLS) as a fixed factor and participants  
 101 as a random intercept factor. This revealed a main effect of interference ( $F(1,8564) =$   
 102  $351.16$ ;  $p < 0.00005$ ;  $\eta_p^2 = 0.04$ ).

103

### 104 **Comparing global-local interference and local-global interference**

105 To establish whether the global-to-local interference effect is stronger than the local-  
106 to-global interference effect, we compared inverse response times using a linear  
107 mixed effects model with block (global/local) and interference (present/absent) as fixed  
108 factors and participants as a random intercept factor. This revealed main effects of  
109 block ( $F(1,26015) = 1449.56, p < 0.000005; \eta_p^2 = 0.05$ ) and interference ( $F(1,26015) =$   
110  $723.08, p < 0.000005; \eta_p^2 = 0.03$ ). Importantly, this revealed a significant but relatively  
111 weaker interaction effect between block and interference ( $F(1,26015) = 11.79;$   
112  $p < 0.005; \eta_p^2 = 0.00045$ ).

### 114 **Congruence effect for GDL D pairs**

115 To assess the statistical significance of these effects in each task block, we fit  
116 a linear mixed effects model on the inverse response times with congruence (2 levels),  
117 image pair ( ${}^7C_2 = 21$  levels) as fixed factors and participants as a random intercept  
118 factor. This revealed a significant main effect of congruence ( $F(1,1212) = 36.33; p <$   
119  $0.000005; \eta_p^2 = 0.029$  in the global block &  $F(1,1206) = 31.95; p < 0.000005; \eta_p^2 = 0.026$   
120 in the local block). We also found significant effects of image pair ( $F(20,1212) = 11.8;$   
121  $p < 0.000005; \eta_p^2 = 0.163$  for global block &  $F(20,1206) = 14.1; p < 0.000005; \eta_p^2 = 0.189$   
122 for local block). Finally, there was a relatively weak but significant interaction effect  
123 between congruence and image pairs in local block ( $F(20,1212) = 1.13; p > 0.05; \eta_p^2 =$   
124  $0.018$  in the global block &  $F(20,1206) = 1.79; p < 0.05; \eta_p^2 = 0.029$  in the local block).  
125 A post-hoc analysis revealed that the incongruence effect was present for 18 of the 21  
126 (86%) image pairs in the global block and 16 of 21 (76%) image pairs in the local block.  
127 Thus, the interaction largely modified the magnitude but not direction of the  
128 incongruence effect.

### 130 **Congruence effect for GSLS pairs**

131 To assess the statistical significance of the congruence effect in each block, we  
132 performed a linear mixed effects model analysis on inverse response times with  
133 congruence (2 levels) as fixed factor and participant as random intercept factor. This  
134 revealed a significant main effect of congruence ( $F(1,4362) = 24.39; p < 0.000005; \eta_p^2 =$   
135  $0.01$  in the global block &  $F(1,4269) = 38.85; p < 0.000005; \eta_p^2 = 0.009$  in the local  
136 block).

### 138 **Is there a greater effect of stimulus congruence in the global block?**

139 We wondered whether participants showed a larger advantage for the  
140 congruent stimuli in the global compared to the local block. To this end, we performed  
141 a linear mixed effects model analysis on inverse reaction times to GDL D pairs with  
142 block (2 levels), congruence (2 levels), shape pair (21 levels) as fixed-factors and  
143 participant as a random intercept factor. This revealed a significant main effect of block  
144 ( $F(1,2434) = 45.75; p < 0.000005; \eta_p^2 = 0.018$ ), congruence ( $F(1,2434) = 66.79; p <$   
145  $0.000005; \eta_p^2 = 0.026$ ) and shape pair ( $F(20,2434) = 21.36; p < 0.000005; \eta_p^2 = 0.149$ ),  
146 block shape pair interaction ( $F(20,2434) = 4.26, p < 0.000005; \eta_p^2 = 0.034$ ) and a  
147 congruence- shape pair interaction ( $F(20,2434) = 1.94, p < 0.05; \eta_p^2 = 0.016$ ).  
148 Importantly, we observed no significant interaction between block and congruence as  
149 would be expected if there was a larger congruent advantage in one block over the  
150 other ( $F(1,2434) = 0.03; p = 0.86$ ).

151 For GSLS pairs, we performed a linear mixed effects model analysis on inverse  
152 reaction times with block (2 levels), congruence (2 levels) as fixed factors and  
153 participants as random intercept factor (we did not include image as a factor because  
154 it was unbalanced). This revealed a significant main effect of block ( $F(1,8647) =$   
155  $171.61$ ;  $p < 0.00005$ ;  $\eta_p^2 = 0.019$ ) and congruence ( $F(1,8647) = 58.69$ ;  $p < 0.00005$ ;  
156  $\eta_p^2 = 0.007$ ). As before we observed no interaction between block and congruence  
157 ( $F(1,8647) = 0.83$ ;  $p = 0.36$ ).

158 We conclude that congruent pairs have an equivalent advantage over  
159 incongruent pairs in both global and local task blocks.

160

## SECTION S2: RT CONSISTENCY & RELATIONS BETWEEN BLOCKS (EXPT 1)

### Do response times in Experiment 1 vary systematically across image pairs?

The subjects showed a global advantage and incongruence effects in the same-different task but we wondered whether there were any other systematic variations in response times across image pairs. Specifically, we asked whether image pairs that evoked fast responses in one group of subjects would also elicit a fast response in another group of subjects. This was indeed the case: we found a significant correlation between the average response times of the first and second half of all subjects in both the global block ( $r = 0.74$ ,  $p < 0.00005$  across 490 pairs; Figure S2) and the local block ( $r = 0.75$ ,  $p < 0.000005$  across 490 pairs; Figure S2B). This correlation was present in all four image types as well in both blocks (Figure S2).

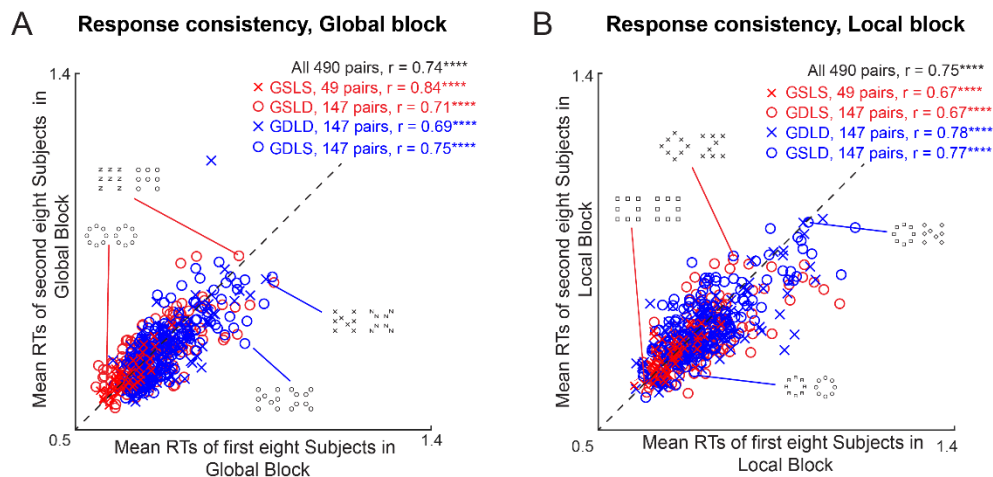

**Figure S2. Consistency of response times in the same-different task**

(A) Average response times for one half of the subjects in the global block of the same-different task plotted against those of the other half. Asterisks indicate statistical significance (\* is  $p < 0.05$ , \*\* is  $p < 0.005$  etc).

(B) Same as (A) but for the local block.

### Are responses in the global and local block related?

Having established that response times are systematic within each block (Section S2), we next investigated how responses in the global and local block are related for the same image pairs presented in both blocks. First, we compared responses to image pairs that elicit identical responses in both blocks. These are the GSLS pairs (which elicit a SAME response in both blocks) and GDLD pairs (that elicit a DIFFERENT response in both blocks). This revealed a positive but not significant correlation between the responses to the GSLS pairs in both blocks ( $r = 0.15$ ,  $p = 0.32$  across 49 image pairs; Figure S3A). By contrast the responses to the GDLD pairs, which were many more in number ( $n = 147$ ), showed a significant positive correlation between the global and local blocks ( $r = 0.24$ ,  $p < 0.005$ ; Figure S3A). Second, we compared image pairs that elicited opposite responses in the global and local blocks, namely the GSLD and GDLS pairs. This revealed a significant negative correlation in both cases ( $r = -0.20$ ,  $p < 0.05$  for 147 GSLD pairs,  $r = -0.23$ ,  $p < 0.0005$  for 147 GDLS pairs; Figure S3B). Thus, image pairs that are hard to categorize as SAME are easier to categorize as DIFFERENT.

Note that in all cases, the correlation between responses in the global and local blocks were relatively small (only  $r = \sim 0.2$ ; Figure S3) compared to the consistency of

199 the responses within each block (split-half correlation = 0.75 in the global block; 0.74  
 200 in the local block;  $n = 490$  &  $p < 0.00005$  for both the conditions; Figure S2). These  
 201 low correlations suggest that responses in the global and local blocks are qualitatively  
 202 different.  
 203

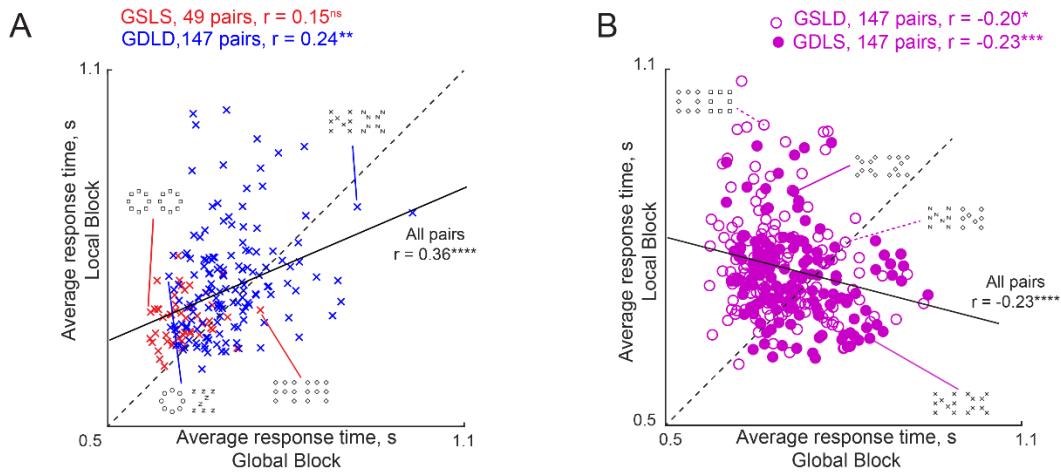

204  
 205 **Figure S3. Responses to hierarchical stimuli in global and local blocks.**  
 206 (A) Average response times in the local block plotted against the global block, for  
 207 image pairs with identical responses in the global and local blocks. These are the  
 208 GSLs pairs (red crosses,  $n = 49$ ) which elicited the “SAME” response in both  
 209 blocks, and the GDL pairs (blue crosses,  $n = 147$ ) which elicited the  
 210 “DIFFERENT” responses in both blocks.  
 211 (B) Average response times in the local block plotted against the global block, for  
 212 image pairs with opposite responses in the global and local blocks. These are the  
 213 GSLD pairs (open circles,  $n = 147$ ) which elicit the “SAME” response in the global  
 214 block but the “DIFFERENT” response in the local block, and the GDLS pairs (filled  
 215 circles,  $n = 147$ ) which likewise elicit opposite responses in the two blocks.



## SECTION S3: DISTINCTIVENESS ANALYSES (EXPT 1)

---

### Effect of distinctiveness on same-different responses in the global block

We estimated distinctiveness of a given image as the inverse response time on trials where the image is presented as a GSLS identical image pair. The estimated distinctiveness for the hierarchical stimuli in the global block is depicted in Figure 3A. It can be seen that shapes with a global circle (“O”) are more distinctive than shapes containing the global shape “A”. In other words, participants responded faster when they saw these shapes.

Having estimated distinctiveness of each image using the GSLS pairs, we asked whether it would predict responses to other pairs. For each image pair containing two different images, we calculated the net distinctiveness as the sum of the distinctiveness of the two individual images. We then plotted the average response times for each GSLD pair (which evoked a “SAME” response) in the global block against the net distinctiveness. This revealed a striking negative correlation ( $r = -0.71$ ,  $n = 147$  &  $p < 0.00005$ ; Figure S4A). In other words, participants responded quickly when a given image pair contained distinctive images. We performed a similar analysis for the GDLS and GDLD pairs (which evoke a “DIFFERENT” response). This too revealed a negative correlation ( $r = -0.46$ ,  $p < 0.00005$  across 294 GDLS and GDLD pairs; Figure S4B;  $r = -0.38$ ,  $n = 147$  &  $p < 0.0005$  for GDLS pairs;  $r = -0.54$ ,  $n = 147$  &  $p < 0.0005$  for GDLD pairs).

If distinctiveness measured from GSLS pairs is so effective in predicting responses to all other pairs, we wondered whether it can also explain the incongruence effect. To do so, we compared the net distinctiveness of congruent pairs with that of the incongruent pairs. Indeed, congruent pairs were more distinctive (average distinctiveness, mean  $\pm$  sd:  $3.31 \pm 0.11$  s<sup>-1</sup> for congruent pairs,  $3.17 \pm 0.14$  s<sup>-1</sup> for incongruent pairs,  $p < 0.005$ , sign-rank test across 21 image pairs; Figure S4C).

### Effect of distinctiveness on same-different responses in the local block

We observed similar trends in the local block. Again, we estimated distinctiveness for each image as the reciprocal of the response time to the GSLS trials in the local block (Figure 3B). It can be seen that shapes containing a local circle were more distinctive compared to shapes containing a local diamond (Figure 3B). Interestingly, the distinctiveness estimated in the local block was uncorrelated with the distinctiveness estimated in the global block ( $r = 0.16$ ,  $p = 0.25$ ).

As with the global block, we obtained a significant negative correlation between the response times for GDLS pairs (which evoked a “SAME” response) and the net distinctiveness ( $r = -0.58$ ,  $n = 147$  &  $p < 0.00005$ ; Figure S4D). Likewise, we obtained a significant negative correlation between the response times of GSLD and GDLD pairs (both of which evoke “DIFFERENT” responses in the local block) with net distinctiveness ( $r = -0.22$ ,  $p < 0.0005$  across 294 GSLD and GDLD pairs; Figure S4E;  $r = -0.24$ ,  $n = 147$  &  $p < 0.005$  for GSLD pairs;  $r = -0.18$ ,  $n = 147$  &  $p < 0.05$  for GDLD pairs). We conclude that distinctive images elicit faster responses.

Finally, we asked whether differences in net distinctiveness can explain the difference between congruent and incongruent pairs. As expected, local distinctiveness was significantly larger for congruent compared to incongruent pairs (average distinctiveness, mean  $\pm$  sd:  $3.08 \pm 0.05$  s<sup>-1</sup> for congruent pairs,  $2.91 \pm 0.11$  s<sup>-1</sup> for incongruent pairs,  $p < 0.00005$ , sign-rank test across 21 image pairs; Figure S4F).

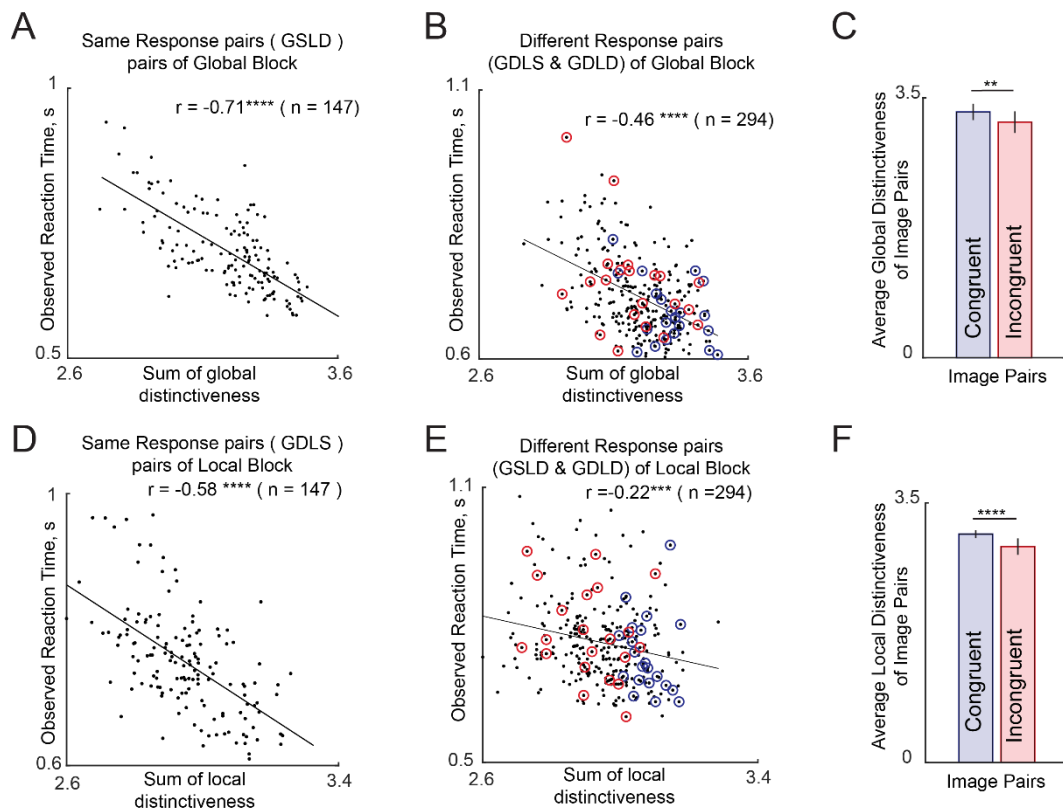

**Figure S4. Distinctiveness from GSLs pairs predicts responses to other pairs**

- (A) Observed response times for GSLD pairs in the global block plotted against the net global distinctiveness estimated from GSLs pairs in the local block.
- (B) Observed response times for GDLS and GDLD pairs plotted against net global distinctiveness estimated from panel A. Congruent pairs (red circles) and incongruent pairs (blue circles) are highlighted.
- (C) Net global distinctiveness calculated for congruent and incongruent image pairs. Error bars represents standard deviation across pairs.
- (D) Observed response times for GDLS pairs in the local block plotted against the net local distinctiveness estimated from GSLs pairs in the local block.
- (E) Observed response times for GSLD & GDLD pairs in the local block plotted against the net local distinctiveness estimated as in panel D. Congruent pairs (red circles) and incongruent pairs (blue circles) are highlighted.
- (F) Net local distinctiveness calculated for congruent and incongruent image pairs. Error bar represents standard deviation across pairs.

266  
 267  
 268  
 269  
 270  
 271  
 272  
 273  
 274  
 275  
 276  
 277  
 278  
 279  
 280  
 281  
 282  
 283  
 284

## SECTION S4: STATISTICAL ANALYSES FOR EXPERIMENT 2

### Global advantage effect in visual search

To establish the statistical significance of the global advantage effect in visual search, we performed a linear mixed effects model analysis on inverse RT with scale of change (global vs local), shape pair (21 levels), common shape (7 levels) as fixed factors and participants as a random intercept factors. This revealed a main effect of scale ( $F(1,4696) = 163.24$ ;  $p < 0.00005$ ;  $\eta_p^2 = 0.034$ ), shape pair ( $F(20,4696) = 80.13$ ;  $p < 0.00005$ ;  $\eta_p^2 = 0.254$ ) and interaction effects for scale & shape pair ( $F(20,4696) = 24.38$ ;  $p < 0.00005$ ;  $\eta_p^2 = 0.094$ ), scale and common shape ( $F(6,4696) = 2.41$ ;  $p < 0.05$ ;  $\eta_p^2 = 0.003$ ) and shape pair and common shape ( $F(120,4696) = 1.37$ ;  $p < 0.05$ ;  $\eta_p^2 = 0.034$ ). There was no main effect of common shape ( $F(6,4696) = 0.88$ ,  $p = 0.051$ ;  $\eta_p^2 = 0.001$ ). A post-hoc analysis revealed that 87 of 147 (59%) of all the matched GDLS-GSLD pairs had a larger average RT for the GDLS pairs, suggesting that these interactions modified the magnitude but not the direction of the effect.

### Congruence effect in visual search

To establish the statistical significance of the congruent effect, we performed a linear mixed effects model analysis with congruence, shape pairs as fixed factor and participants as random intercept factor on the inverse reaction times. This analysis revealed a main-effect of congruence ( $F(1,664) = 35.87$ ,  $p < 0.00005$ ;  $\eta_p^2 = 0.051$ ) and shape pair ( $F(20,664) = 10.93$ ,  $p < 0.0005$ ;  $\eta_p^2 = 0.248$ ) and an interaction between congruence and shape pair ( $F(20,664) = 2.62$ ;  $p < 0.0005$ ;  $\eta_p^2 = 0.073$ ). A post-hoc analysis revealed that 18 of 21 (86%) of all congruent pairs had faster response times than their corresponding incongruent pairs, suggesting that the interactions modified the magnitude but not the direction of the congruence effect.

### Target congruence effect in visual search

To investigate the statistical significance of the congruent target effect, we performed a linear mixed effects model analysis with congruence (2 levels), shape pairs ( ${}^7C_2 = 21$  levels) as fixed factors and participants as random intercept factor on the inverse of mean reaction times (for each shape pair congruent and incongruent reaction times are estimated by averaging across  $5P2 \times 2$  searches). This analysis revealed a main-effect of shape pair ( $F(20,328) = 21.99$ ,  $p < 0.00005$ ;  $\eta_p^2 = 0.573$ ), and an interaction between distractor congruence and shape pair ( $F(20,328) = 6.96$ ,  $p < 0.00005$ ;  $\eta_p^2 = 0.298$ ). There was no main effect of target congruence ( $F(1, 328) = 3.73$ ,  $p = 0.054$ ;  $\eta_p^2 = 0.011$ ).

### Distractor congruence effect in visual search

To establish the statistical significance of the congruent distractor effect, we performed a linear mixed effects model analysis with congruence (2 levels), shape pairs ( ${}^7C_2 = 21$  levels) as fixed factors and participants as random intercept factor on the inverse of mean reaction times (for each shape pair congruent and incongruent reaction times are estimated by averaging across  $5P2 \times 2$  searches). This analysis revealed a main-effect of distractor congruence ( $F(1, 328) = 34.85$ ,  $p < 0.00005$ ;  $\eta_p^2 = 0.096$ ) and shape pair ( $F(20,328) = 18.45$ ,  $p < 0.00005$ ;  $\eta_p^2 = 0.529$ ), and an interaction between distractor congruence and shape pair ( $F(20,328) = 3.28$ ,  $p < 0.00005$ ;  $\eta_p^2 = 0.167$ ).

## SECTION S5: VISUALIZATION OF SEARCH SPACE

We used the reaction times from Experiment-2 to estimate the dissimilarity between shape pairs. Previous studies have shown that  $1/RT$  is a good estimate of dissimilarity between shapes. Multidimensional scaling technique estimates the 2D coordinates of each stimulus such that distances between these coordinates match best with the observed distances. In two dimensions with 49 hierarchical stimuli, there are only  $49 \times 2 = 98$  unknown coordinates that have to match the  ${}^{49}C_2 = 1,176$  observed distances. We emphasize that multidimensional scaling only offers a way to visualize the representation of the hierarchical stimuli at a glance; we did not use the estimated 2D coordinates for any subsequent analysis but rather used the directly observed distances themselves. Two interesting patterns can be seen. First, stimuli with the same global shape clustered together, indicating that these are hard searches. Second, congruent stimuli (i.e. with the same shape at the global and local levels) were further apart compared to incongruent stimuli (with different shapes at the two levels), indicating that searches involving congruent stimuli are easier than incongruent stimuli. These observations concur with the global advantage and incongruence effect described above in visual search.

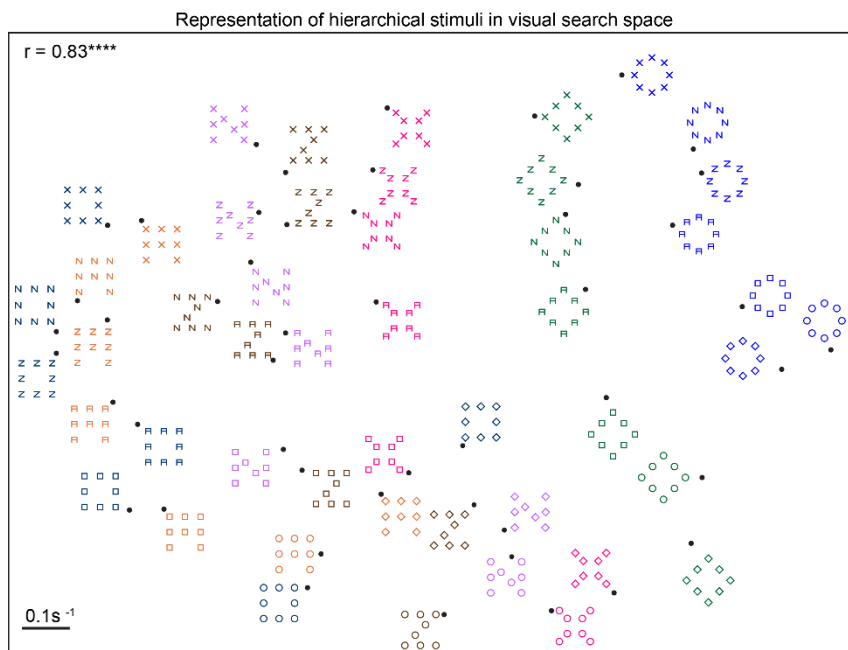

**Figure S4. Visualization of hierarchical stimuli in visual search space.** Representation of hierarchical stimuli in visual search space, as obtained using multidimensional scaling. Stimuli of the same colour correspond to the same global shape for ease of visualization. The actual stimuli were white shapes on a black background in the actual experiment. In this plot, nearby points represent hard searches. The correlation coefficient at the top right indicates the degree of match between the two-dimensional distances depicted here with the observed search dissimilarities in the experiment. Asterisks indicate statistical significance: \*\*\*\* is  $p < 0.00005$ .

**Is search for hierarchical stimuli explained better using RT or 1/RT models?**

The results in the main text show that search for hierarchical stimuli is best explained using the reciprocal of search time (1/RT), or search dissimilarity. That models based on 1/RT provides a better account than RT-based models was based on our previous findings (Vighneshvel and Arun, 2013; Pramod and Arun, 2014, 2016; Sunder and Arun, 2016). Here we reconfirmed this finding on the visual search experiment in this study (i.e. Experiment 2).

We tested models based on both search response times (RT) and search dissimilarity (1/RT) to identify the best model that accounts for the data. In each case, we fit the full model, in which the net RT or 1/RT corresponding to the search for two hierarchical stimuli is a weighted sum of shape differences at the global and local level as well as cross-scale terms across and within objects (Figure 7B). Because the two models have the same number of free parameters, we compared their quality of fit directly using their overall correlation with the observed data as well as using their residual errors.

Our main finding is that the 1/RT model outperformed the RT model both in predicting the RT and the 1/RT data in terms of correlations (correlations with 1/RT data: 0.88 and 0.81 for the 1/RT and RT models,  $p < 0.00005$ , Fisher's z-test; correlations with RT data: 0.88 & 0.87 for the 1/RT and RT models,  $p = 0.2$ ). For a finer-grained comparison between the RT and 1/RT models, we compared their residual errors. Here too, the residual error for the 1/RT model was lower than the RT model for both RT & 1/RT data (average absolute error in RT: 0.21 & 0.28 s for the 1/RT and RT models,  $p < 0.00005$ , rank-sum test across 1176 observations; average absolute error in 1/RT: 0.09 & 0.13  $s^{-1}$  for the 1/RT and RT models,  $p < 0.00005$ ). We conclude that the 1/RT based model provided a better fit to the search data.

**Can a simpler multiscale model account for the data?**

In the full model described above, the dissimilarity between hierarchical stimuli was taken as a weighted sum of local and global shape differences as well as cross-scale differences both within and across objects. This model yielded excellent fits to the data, but it is possible that a simpler model (using only a subset of these terms) performs just as well.

Comparing the full model with simpler sub-models containing only some types of terms is non-trivial because a complex model will always yield better fits to a given set of data than a simple model by virtue of having more degrees of freedom. Therefore we used a quality of fit measure known as the Akaike's Information Criterion or AICc (Pramod and Arun, 2014, 2016) that penalizes the overall model error by its complexity. The AICc of any model can be calculated as:  $AICc = abs \left( N \log \left( \frac{SS}{N} \right) + 2K + \frac{2K(K+1)}{(N-K-1)} \right)$ , where N is the number of observations, SS is the sum of squared errors between the model and data across all observations, and K is the number of free parameters in the model. A larger AICc implies a better model.

To compare the quality of fit of two models, we performed a bootstrap analysis. We first resampled the observations with replacement, fit each model and calculated the AICc for each iteration. We then calculated the fraction of bootstrap samples (across 1176 iterations) in which the AICc of one model was larger than that of the other. If this fraction was larger than 95% or smaller than 5% we deemed one model to be superior to the other in terms of the quality of fit.

413 We fit a number of sub-models that contained various subsets of terms from  
 414 the full model. Comparing these models on their performance is however not  
 415 straightforward because some models may have naturally better fits to the data owing  
 416 to their greater degrees of freedom. We therefore compared the Akaike's Information  
 417 Criterion or AICc (see above), which takes into account not only the overall residual  
 418 error between the model predictions and the data, but also penalizes models for  
 419 having greater degrees of freedom. The results are summarized in Table S1. It can be  
 420 seen that the full model explains the data better than all sub-models and is superior  
 421 both in terms of the overall correlation as well as the AICc quality of fit. It can also be  
 422 seen that global terms contribute the most to the fit, followed by local terms and then  
 423 by the cross-scale interactions.

| <b>Model</b>             | <b>dof</b> | <b>Model Correlation</b> | <b>Quality of fit<br/>AICc (mean ± sd)</b> |
|--------------------------|------------|--------------------------|--------------------------------------------|
| G                        | 22         | 0.67****                 | 3550 ± 44**                                |
| L                        | 22         | 0.45****                 | 3114 ± 38**                                |
| X                        | 22         | 0.34****                 | 2989 ± 46**                                |
| W                        | 22         | 0.30****                 | 2952 ± 42**                                |
| GL                       | 43         | 0.83****                 | 4194 ± 53**                                |
| GX                       | 43         | 0.71****                 | 3619 ± 44**                                |
| GW                       | 43         | 0.71****                 | 3608 ± 44**                                |
| LX                       | 43         | 0.55****                 | 3232 ± 47**                                |
| LW                       | 43         | 0.52****                 | 3175 ± 42**                                |
| XW                       | 43         | 0.39****                 | 2998 ± 45**                                |
| GLX                      | 64         | 0.85*                    | 4298 ± 52*                                 |
| GLW                      | 64         | 0.85*                    | 4291 ± 50*                                 |
| GXW                      | 64         | 0.74****                 | 3676 ± 44**                                |
| LXW                      | 64         | 0.59****                 | 3250 ± 49**                                |
| <b>Full Model (GLXW)</b> | <b>85</b>  | <b>0.88</b>              | <b>4430 ± 52</b>                           |

425 **Table S1. Comparison of submodels with the full 1/RT model.** In each case the  
 426 1/RT model containing a subset of the model terms was fit to the full set of 1176 search  
 427 dissimilarities. The best model, depicted in **bold face**, was the full model containing  
 428 global (G), local (L), cross-scale across object (X) and cross-scale within object (W)  
 429 terms. Asterisks in the model correlation column indicate the statistical significance of  
 430 comparing each model with the best model using a Fisher's z-test on correlation  
 431 coefficients (\* is  $p < 0.05$ , \*\* is  $p < 0.005$  etc). Asterisks in the AICc column indicate  
 432 statistical significance of comparing each model with the best model, calculated as the  
 433 fraction of bootstrap samples in which the AICc was larger than the AICc of the best  
 434 model.

435  
 436

437

## SECTION S7: SIMPLIFYING HIERARCHICAL STIMULI (EXPT S1)

---

438  
439  
440 Having characterized how global and local shape combine in hierarchical  
441 stimuli, we wondered whether we can obtain further insights by varying their  
442 component properties. One fundamental issue with hierarchical stimuli is that the  
443 global shape is formed using the local shapes, making them inextricably linked. We  
444 therefore wondered whether hierarchical stimuli can be systematically related to  
445 simpler stimuli in which the global and local shape are independent of each other.

446 These simpler stimuli are shown in Figure S5A. For each hierarchical stimulus,  
447 we created an equivalent “interior-exterior” stimulus in which an external contour with  
448 the same shape as the global shape encloses a random arrangement of interior  
449 elements with the same number and local shape (Figure S5A). We repeated this for  
450 two element sizes because the grouping of local elements into a global shape is  
451 affected by size (Figure S5B). This design allowed us to ask whether feature  
452 integration is similar in hierarchical stimuli compared to the interior-exterior stimuli.

### METHODS

453  
454  
455 *Subjects.* Eight right-handed human subjects (7 male, aged 23-28 years) participated  
456 in the study. All other details were as in Experiment 2.

457  
458 *Stimuli.* We designed hierarchical stimuli (H) and matched interior-exterior (IE) stimuli.  
459 The hierarchical stimuli were created by combining 5 shapes at the local and global  
460 levels in all possible combinations, resulting in a total of 25 stimuli. The interior-exterior  
461 (IE) stimuli were derived from the hierarchical stimuli by arranging the local shapes in  
462 a fixed configuration, and replacing the global form of the hierarchical stimulus by a  
463 solid closed contour (Figure S1A). Shapes were chosen such that their exterior/global  
464 version was large enough to accommodate 8 local shapes without intersecting with  
465 the local shapes. To investigate how the size of the local elements influences the  
466 overall dissimilarity, we created a new set of hierarchical and interior-exterior stimuli  
467 in which the local elements were 75% of their original size (size 2; Figure S1B). Thus  
468 there were four sets of 25 stimuli used in the experiment (hierarchical and interior-  
469 exterior at 2 sizes each). Subjects performed visual search involving all possible pairs  
470 of stimuli within each set, with the result that there were  ${}^{25}C_2 \times 4 = 1200$  unique  
471 searches in the experiment. All other details were identical to Experiment 2.

472  
473 *Model fitting.* We fit the multiscale model to all 300 searches corresponding to each  
474 stimulus set. Since there were 5 unique parts, there were  ${}^5C_2 = 10$  model parameters  
475 for each group of global, local, across and within terms. Together with a constant term,  
476 the multiscale model consisted of 41 free parameters in all. All other details are as in  
477 Experiment 2.

### RESULTS

478  
479  
480 Subjects performed visual search using matched hierarchical stimuli and  
481 interior-exterior stimuli at two local element sizes (Figure S5A-B). For ease of  
482 exposition, we first describe results for the hierarchical and interior-exterior stimuli at  
483 the larger size (size 1), and then describe the effect of changing local element size  
484 (size 1 vs 2).

## 488 **Is the representation of interior-exterior stimuli similar to hierarchical stimuli?**

489 Subjects were highly consistent in their performance on searches involving both  
490 hierarchical and interior-exterior stimuli (split-half correlation between RT for odd and  
491 even subjects: 0.79 & 0.93 for hierarchical and interior-exterior stimuli both of size 1,  
492  $p < 0.00005$ ).

493 To visualize the underlying representation, we performed a multidimensional  
494 scaling analysis on the average search dissimilarities for each set separately. As  
495 before, the hierarchical stimuli tended to group according to the global shape (Figure  
496 S1C). This trend was even more evident for the interior-exterior stimuli (Figure S5D).  
497 Thus, hierarchical and interior-exterior stimuli have qualitatively similar  
498 representations.

499 To quantify these observations, we directly compared the pairwise  
500 dissimilarities between hierarchical stimulus pairs and interior-exterior pairs. This  
501 revealed a significant positive correlation ( $r = 0.65$ ,  $p < 0.0005$ ; Figure S5E). We note  
502 that this correlation is only modest even though the interior-exterior dissimilarities and  
503 hierarchical dissimilarities were themselves highly consistent. This implies that there  
504 are subtle representational differences between the two sets. We therefore wondered  
505 whether the multiscale model would be able to account for these differences. This was  
506 indeed the case: multiscale model predictions on both sets were excellent ( $r = 0.91$  &  
507  $0.96$  for hierarchical and interior-exterior sets; Figure S5F). These correlations were  
508 virtually the same as the reliability of the data itself ( $rc = 0.89 \pm 0.008$  for hierarchical  
509 stimuli;  $rc = 0.90 \pm 0.003$  for interior-exterior stimuli). Thus, the multiscale model  
510 explains nearly all the explainable variance in the data. This in turn implies that  
511 whatever subtle representational differences exist between hierarchical and interior-  
512 exterior stimuli must arise from systematic differences in their model parameters.

513 We therefore compared the model parameters for the two sets – and observed  
514 several interesting patterns (Figure S5G). First, model terms corresponding to global  
515 shape differences were stronger in the interior-exterior stimuli (average magnitude:  
516  $0.47$  &  $0.94$  for hierarchical and interior-exterior,  $p < 0.005$ , sign-rank test on 10 global  
517 terms). This is as expected given the stronger clustering by global shape for the  
518 interior-exterior stimuli. However the global terms for hierarchical and interior-exterior  
519 stimuli were significantly correlated, indicating that the underlying representation is  
520 similar ( $r = 0.73$ ,  $p = 0.016$ ). This correlation was even higher across all model terms  
521 ( $r = 0.85$ ,  $p < 0.00005$  across 41 model terms for hierarchical and interior-exterior  
522 stimuli).

523 Second, model parameters corresponding to local shape differences and cross-  
524 scale interactions were weaker in the interior-exterior stimuli (average magnitude of  
525 local terms:  $0.13$  &  $0.045$  for hierarchical and interior-exterior,  $p < 0.005$ , sign-rank  
526 test; cross-scale across object terms:  $0.1$  &  $0.03$ ,  $p < 0.005$ ; cross-scale within-object:  
527  $0.18$  &  $0.06$ ,  $p < 0.005$ ; Figure S5G). Third, as before, in both sets, model parameters  
528 corresponding to local and cross-scale terms were generally correlated with the global  
529 terms in the same way as in Experiment 1 (correlation with global terms for hierarchical  
530 stimuli across  ${}^5C_2 = 10$  shape pairs:  $r = 0.9$ ,  $p < 0.005$  for local,  $r = 0.86$ ,  $p < 0.005$  for  
531 across and  $r = -0.57$ ,  $p = 0.08$  for within terms; for interior-exterior stimuli:  $r = 0.75$ ,  $p$   
532  $< 0.05$  for local,  $r = 0.33$ ,  $p = 0.33$  for across and  $r = -0.19$ ,  $p = 0.5$  for within terms).  
533 These correlations indicate that model parameters are driven by a common shape  
534 representation.

535  
536  
537



538 **How do model parameters change when local shapes are made smaller?**

539 Next we asked how the estimated model parameters of the hierarchical and  
540 interior-exterior stimuli change if the local elements became smaller. In general search  
541 times with larger local elements was faster (average search times: 1.72 and 1.90 s for  
542 hierarchical stimuli size 1 and 2,  $p < 0.005$ , sign-rank test on mean response times;  
543 1.32 and 1.37 for interior-exterior stimuli size 1 & 2,  $p = 0.83$ , sign-rank test). The  
544 multiscale model again yielded excellent fits at this size too (correlation between  
545 observed & predicted dissimilarity for size 2:  $r = 0.93$  for hierarchical stimuli,  $r = 0.96$   
546 for interior-exterior stimuli,  $p < 0.00005$  in both cases). Importantly, model parameters  
547 changed systematically when local elements were smaller (Figure S5H). These  
548 changes were similar for both sets of stimuli, suggesting that local element size  
549 influences both stimuli similarly. The general pattern is that, when local elements  
550 decrease in size, global terms become larger whereas local and cross-scale terms  
551 become weaker (Figure S5H).

552 To summarize, the multiscale model provided excellent fits for searches  
553 involving both hierarchical and interior-exterior stimuli even across changes in local  
554 element size. Both stimuli were driven by a common underlying shape representation,  
555 and their differences were explained by systematic differences in model parameters.  
556 The differences in the model parameters indicate that interior-exterior stimuli have  
557 more salient exterior shapes with weaker local and cross-scale interactions. The  
558 weaker local and cross-scale interactions could be due to the increased salience of  
559 the global shape or due to the greater proximity of the local shapes to each other. In  
560 subsequent experiments we designed stimuli to distinguish between these  
561 possibilities.

562  
563 **How do model parameters change with local shape properties?**

564 The above findings suggest that the multiscale part sum model parameters  
565 change systematically with local element size. To further investigate how model  
566 parameters change with other local shape properties, we varied the size, position,  
567 number and grouping status of the local elements in the interior-exterior stimuli  
568 (Sections S2-4). We obtained excellent model fits in all cases, and model parameters  
569 varied systematically with these manipulations.

570

571

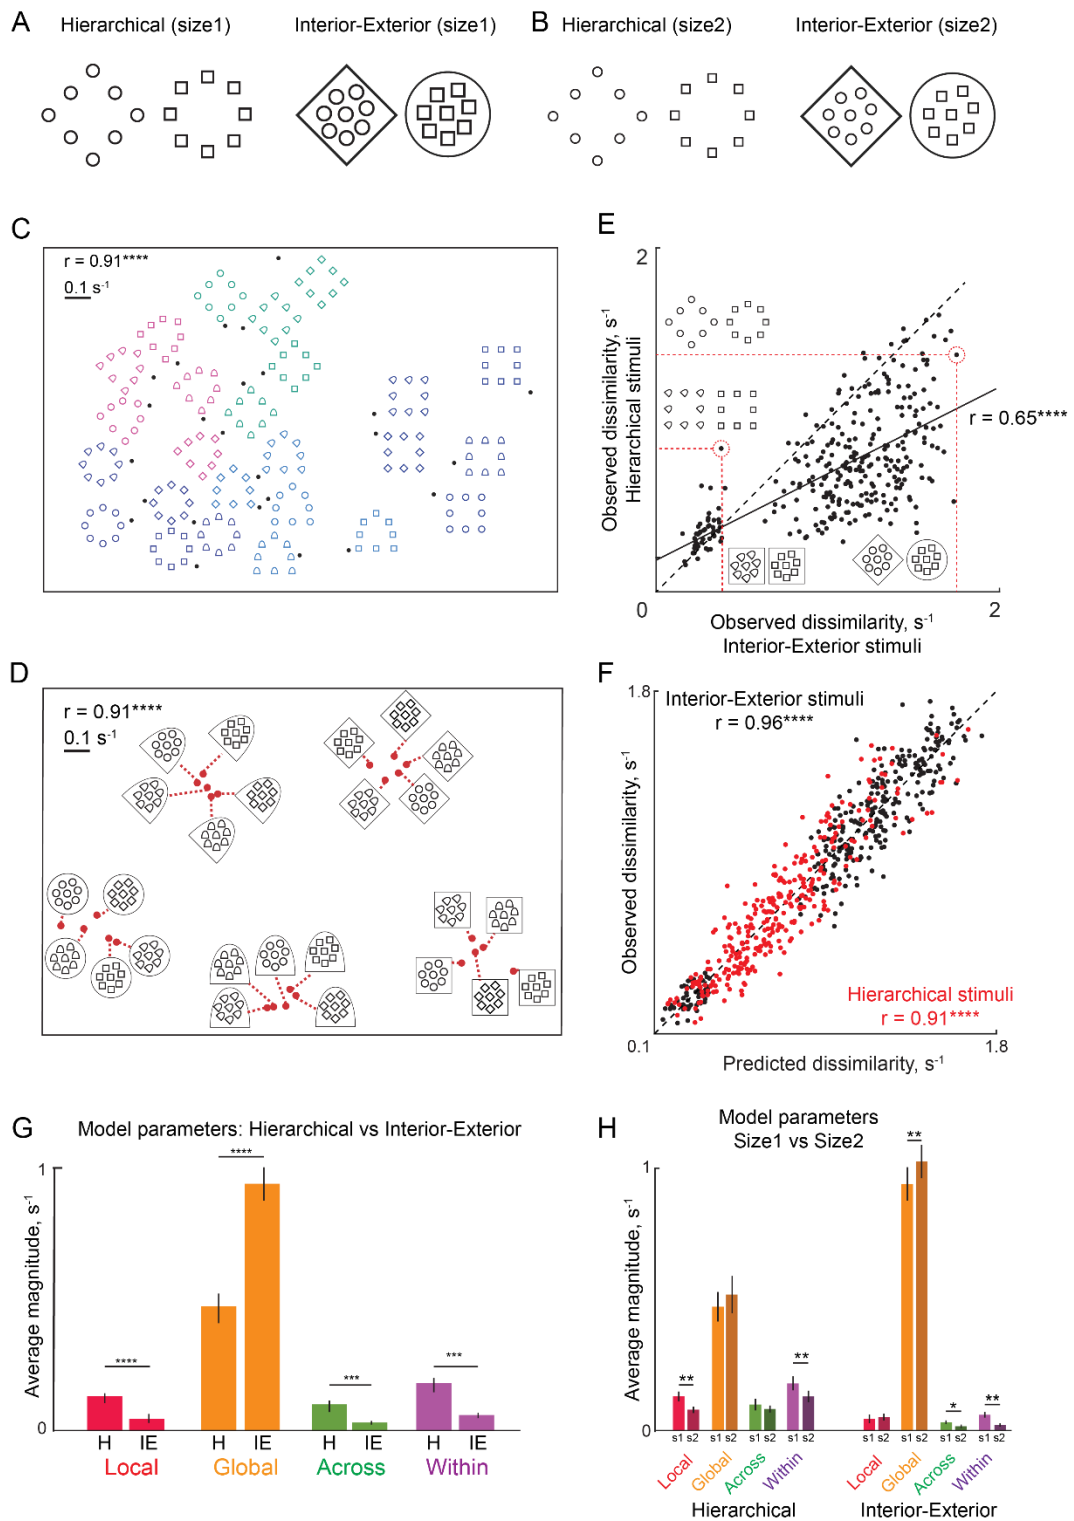

572  
573  
574  
575  
576  
577  
578  
579

### Figure S5. Simplifying hierarchical stimuli into interior-exterior stimuli

(A) Example pair of hierarchical stimuli and interior-exterior stimuli. Understanding global and local shape integration in hierarchical stimuli is complicated by the fact that the global shape is inextricably linked to and formed by the local shape. We attempted to simplify each hierarchical stimulus into an “interior-exterior” stimulus in which the external contour matches the global shape and the shape and number of the internal elements matches the local shape.

- 580 (B) Example hierarchical and interior-exterior stimulus pairs with smaller size elements  
581 (size 2).
- 582 (C) Visualization of the underlying shape representation for hierarchical stimuli (Size  
583 1), as obtained using multidimensional scaling.
- 584 (D) Same as (C) but for the matched interior-exterior stimuli (Size 1).
- 585 (E) Observed dissimilarities for hierarchical pairs plotted against that of Interior-  
586 Exterior pairs (Size 1), with example pairs highlighted (*red dotted lines*). The solid  
587 line represents the best-fitting straight line and the dotted line is the  $y = x$  line.
- 588 (F) Observed versus predicted dissimilarity for hierarchical stimuli (*red*) and interior-  
589 exterior stimuli (*black*) for Size 1.
- 590 (G) Average magnitude of model terms for hierarchical stimuli (H) and Interior-Exterior  
591 (IE) stimuli for Size 1. Note that within-object terms are generally negative but their  
592 magnitude is depicted for ease of comparison. Asterisks indicate statistical  
593 significance as calculated using a sign-rank test on the model parameters, with  
594 conventions as before.
- 595 (H) Average magnitude of model parameters for Size 1 vs Size 2 for both hierarchical  
596 (H) and interior-exterior (IE) stimuli. Asterisks indicate statistical significance as  
597 calculated using a sign-rank test on the model parameters, with conventions as  
598 before.  
599

## SECTION S8. CHANGING ELEMENT SIZE, POSITION & NUMBER (EXPT S2)

In Experiment 3, we demonstrated that hierarchical and interior-exterior stimuli are driven by a common shape representation. Here we manipulated the position, size and numerosity of local elements in highly simplified interior-exterior stimuli to understand how these changes affect the overall representation.

### METHODS

*Subjects.* Eight right-handed human subjects (5 male, aged 21-28 years) participated in the study. All other details were as in Experiment 1.

*Stimuli.* We created four sets each containing 25 stimuli. Set 1 was a reference set containing a single exterior shape and a single interior shape (Figure S2). In Set 2, all stimuli were identical to Set 1 except that the interior shape was shifted to the left. In Set 3, the interior shape was double the size of the Set 1 stimuli. In Set 4, there were two local elements of the same size as in Set 1.

*Procedure.* Subjects performed searches involving all pairwise stimuli within each set. Thus in all there were  ${}^{25}C_2 \times 4$  sets = 1200 searches. Subjects performed 98.3  $\pm$ 0.001% correct trials for each unique search. All details were identical to Experiment 1 except that the Set 1 stimuli measured 3.4° along the longest dimension, and the inter-item spacing was slightly smaller at 3.35°.

### RESULTS

We measured visual search performance on four sets of stimuli in which local elements were varied in position, size and number (Figure S2A). Subjects were highly consistent in their search performance across all four sets (split-half correlation between RT of odd- and even-numbered subjects:  $r = 0.92, 0.92, 0.87$  &  $0.89$  for Sets 1-4 respectively,  $p < 0.00005$  in all cases). Observed dissimilarity was also highly correlated across sets, indicating that the underlying shape representations are very similar (Figure S2B).

To visualize the underlying shape representation we performed a multidimensional scaling as before. The resulting plot for Set 1 is shown in Figure S2C. It can be seen that stimuli with the same global shape cluster together, indicating that these are hard searches.

As before, the multiscale model yielded excellent fits to the data ( $r = 0.95, 0.95, 0.93$  &  $0.94$  for Sets 1-4 respectively,  $p < 0.00005$  in all cases; Figure S2D), implying that variations in the underlying representation across sets due to local element properties are captured by systematic changes in model parameters. These changes are summarized in Figure S2E. The most obvious pattern is that the global terms are substantially larger than all other model terms, indicating that search difficulty is dominated by differences in global shape (Figure S2E). However model parameters varied systematically across the four sets, as discussed below.

We first asked what happens to the shape representation with a change in the local element position (Set 1 vs Set 2). Interestingly, when the local element is shifted away from the centre, local terms became smaller and within-object interactions increased (Figure S2E). However, the underlying shape representation was extremely similar, as evidenced by a strong correlation between the global terms across both sets ( $r = 0.96, p < 0.00005$ ).

648           Next, we analysed how the shape representation changes when the local  
649 elements increase in size (Set 1 vs Set 3). We found that global terms decreased,  
650 whereas cross-scale interactions both across and within objects increased (Figure  
651 S2E). Because some of these changes tend to increase dissimilarity whereas others  
652 will cause a decrease, the overall dissimilarity is unlikely to change. Indeed, search  
653 times were not systematically different across the two sets (average search times:  
654 0.88 & 0.90 s for Sets 1 & 3 respectively,  $p = 0.11$ , rank sum test across 300 searches).  
655 Thus, increasing local element size increases cross-scale interactions across  
656 hierarchical levels.

657           We then asked how the shape representation changes when the number of  
658 local elements increases from 1 to 2. The only significant change was that cross-scale  
659 across-object terms were larger in Set 4 compared to Set 1 (Figure S2E). Set 3 is also  
660 an interesting comparison with Set 4 because the total area of the local elements is  
661 the same in both Sets. Here, we found that global terms were larger, but within-object  
662 interactions were smaller for two local elements (Set 4) compared to one large element  
663 (Set 3). Taken together, these changes mean that increasing the number of elements  
664 increases cross-scale interactions compared to a single small element, but the net  
665 increase is still much smaller compared to having a single large element of the same  
666 size.

667           To summarize, visual search for interior-exterior stimuli across changes in local  
668 element position, size and number is explained extremely well by the multiscale model.  
669 Moving local elements away from the centre (closer to the exterior shape), increasing  
670 their number, or increasing size all led to increased cross-scale interactions.

671  
672

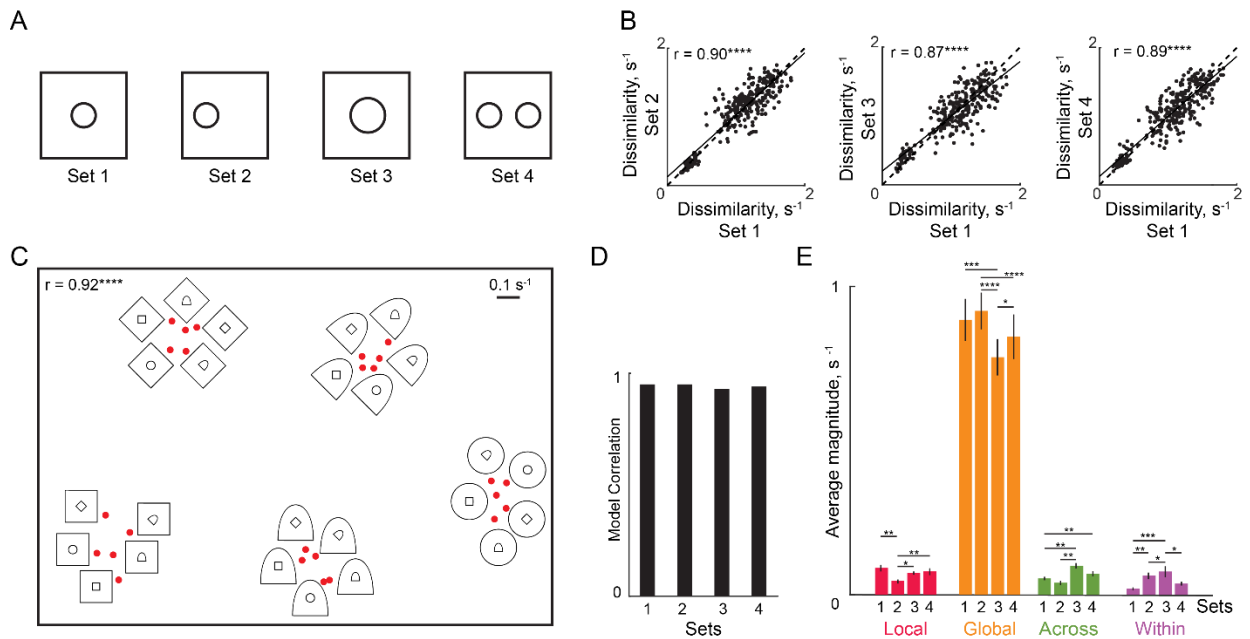

673  
674  
675  
676  
677  
678  
679  
680  
681  
682  
683  
684  
685  
686  
687  
688  
689

**Figure S6: Effect of local element position, size and number**

- (A) Example stimuli from Sets 1-4. Set 1 is the reference, with the local shape at the centre of the exterior contour. In Set 2 the interior shape is shifted away from the centre. In Set 3, the local shape is doubled in size. In Set 4, two local shapes are placed equidistant from the centre on either side.
- (B-D) Observed dissimilarity of all 300 pairs of stimuli in each set plotted against Set 1. The *solid line* is the best-fitting line and the *dotted line* represents the unit line ( $y = x$ ).
- (E) Visualization of the underlying shape representation for the reference set (Set 1), as obtained using multidimensional scaling. All conventions are as before.
- (F) Correlation between predicted and observed dissimilarities for each set.
- (G) Average magnitude of model parameters for Sets 1-4. Asterisks represent statistical significance assessed using a signed-rank test: \* is  $p < 0.05$ , \*\* is  $p < 0.005$ . All comparisons are not significant ( $p > 0.05$ ) unless marked with an asterisk.

690 **SECTION S9: CHANGING ELEMENT POSITION (EXPT S3)**

---

691  
692 In the previous section, we showed that moving a local element away from the  
693 center of an exterior shape tended to increase cross-scale interactions. Here, we  
694 explored this issue further by asking what would happen if the local element was  
695 moved even further to intersect the exterior shape or even be located outside it.

696  
697 **METHODS**

698 *Subjects.* Eight right-handed human subjects (6 male, aged 20-26 years) participated  
699 in the study. All other details are as in Experiment 1.

700  
701 *Stimuli.* We created interior-exterior stimuli with a single local shape whose bounding  
702 box was quarter the area of that of the global shape (Figure S7A). We also modified  
703 the local shapes to be larger in size compared to the Experiment 3 so as to increase  
704 the salience of the local and cross-scale terms and reduce the dominance of the global  
705 terms. We created four sets of 25 stimuli each by combining five shapes in the interior  
706 with the same five shapes for the exterior contour in all possible ways. The four sets  
707 were identical except for the position of the local shape: it could be at the centre (Set  
708 1), between the centre and the left edge (Set 2), centred on the global shape contour  
709 (Set 3) and finally located outside the exterior shape (Set 4). These are depicted in  
710 Figure S7A. To avoid novel conjunctions with the exterior shapes as the interior shape  
711 is moved, we used shapes with vertical edges on both left and right sides, with the  
712 result that all shapes differed only in contours on the top or bottom sides. The interior  
713 shape was presented in a green colour to facilitate grouping particularly for Set 3  
714 where the interior and exterior contours overlap.

715  
716 *Procedure.* Subjects performed an oddball search task on 4 x 4 search arrays as  
717 before, with the largest item measuring 4.1°. All other details are same as that of  
718 Experiment 2.

719  
720 **RESULTS**

721 In this experiment, subjects performed searches on sets of interior-exterior  
722 stimuli in which the center element varied in position. Subjects were highly consistent  
723 in their search performance on stimuli in each set (split-half correlation between RT of  
724 odd- and even-numbered subjects:  $r = 0.82, 0.87, 0.80$  &  $0.81$  for Sets 1-4  
725 respectively,  $p < 0.0005$  in all cases). The observed dissimilarity was also extremely  
726 similar across Sets, suggesting that the underlying shape representation is  
727 qualitatively similar (Figure S7B). However, search difficulty varied systematically  
728 across sets (average search times: 2.00, 1.97, 2.35 and 2.13 s for Sets 1-4), with Set  
729 2 being the easiest ( $p < 0.05$ , rank-sum test across 300 searches of Set 2 with all other  
730 sets) and Set 3 being the hardest ( $p < 0.00005$ , rank-sum test across 300 searches of  
731 Set 3 with all other sets).

732 To visualize the underlying shape representation, we performed  
733 multidimensional scaling as before. In the resulting plot, shown for Set 1 (Figure S7C),  
734 it can be seen that stimuli are still clustered according to their global shapes but the  
735 grouping is not as strong as in Experiment 3 (i.e. compared to Figure S2C).

736 As before, the multiscale model yielded excellent fits to the data ( $r = 0.93, 0.93,$   
737  $0.93$  &  $0.92$  for Sets 1-4 respectively,  $p < 0.00005$  in all cases; Figure S7D), implying  
738 that variations in the shape representation due to local element position is captured  
739 by systematic changes in model parameters. These changes are summarized in

740 Figure S7E. Unlike the previous experiment (Section S3) where global terms  
741 dominated all others, global terms were comparable in magnitude to other model terms  
742 and did not vary with element position (Figure S7E). We observed systematic changes  
743 in model parameters across sets, as detailed below.

744 We observed a non-monotonic change in model parameters across sets: local  
745 terms became larger from Set 1 to Set 2 as in the previous experiment but became  
746 much smaller for Set 3 (where the local & global contours overlap) and increased again  
747 from Set 3 to 4 (Figure S7E). Cross-scale across-object terms also followed the same  
748 pattern although they did not show as big a drop for Set 3 as the local terms (Figure  
749 S7E). Cross-scale within-object interactions were strongest when the local shape was  
750 at the centre and decreased in magnitude as its position shifted to the left.

751 Sets 2 & 4 are an interesting comparison because the local shape is equally far  
752 away from the edge of the exterior contour, but different both in terms of being inside  
753 vs outside as well as distance from the centre of the exterior contour. Compared to  
754 Set 2, local and cross-scale terms (both across and within) were smaller in Set 4  
755 (Figure S7E).

756 To summarize, visual search for interior-exterior stimuli is explained extremely  
757 well by the multiscale model across changes in local element position. Overlaying the  
758 local shape on top of the exterior contour (Set 3) strongly reduced the contribution of  
759 local terms, indicative of interference due to contour grouping. Local elements  
760 enclosed within and near to the exterior contour yielded local and cross-scale terms  
761 that were the strongest in magnitude, whereas local elements situated outside the  
762 exterior contour yielded weak local and cross-scale terms.

763



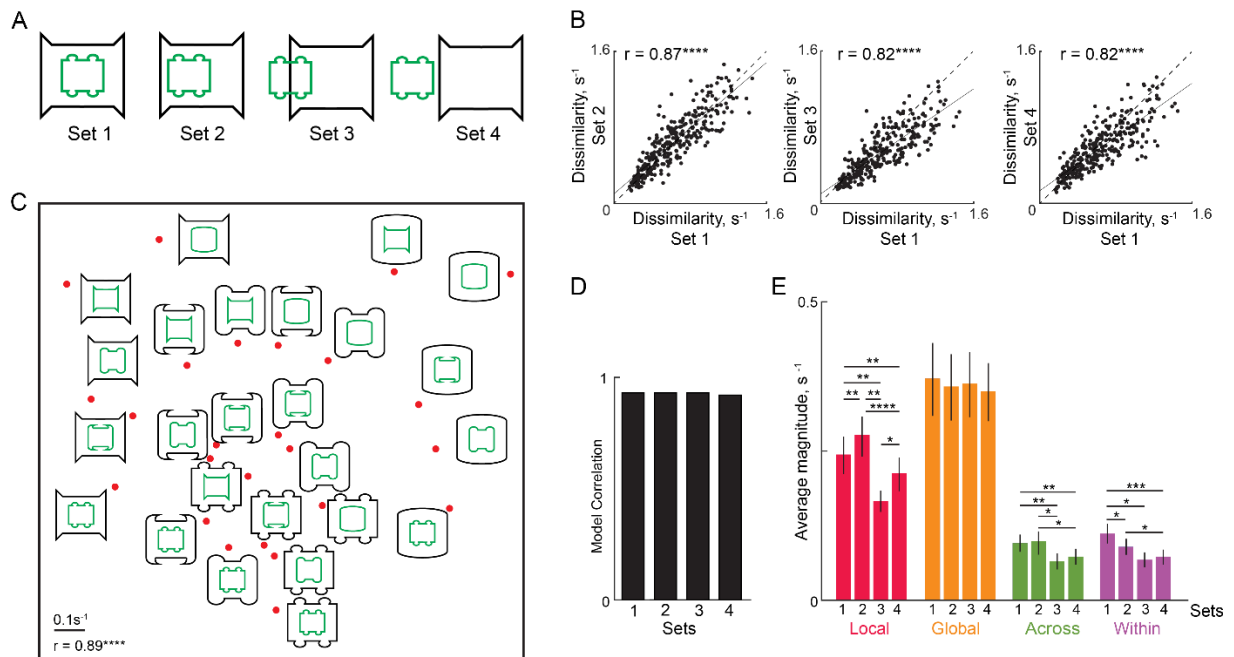

764  
765  
766  
767  
768  
769  
770  
771  
772  
773  
774  
775  
776  
777

**Figure S7: Effect of local element position**

- (A) Example stimuli from Sets 1-4, in which local elements were made larger compared to the previous experiments and were shifted along a much larger range of positions.
- (B-D) Observed dissimilarity of all 300 pairs of stimuli in each set plotted against Set 1.
- (E) Visualization of the underlying shape representation for the reference set (Set 1), as obtained using multidimensional scaling. All conventions are as before.
- (F) Correlation between predicted and observed dissimilarities for each set.
- (G) Average magnitude of model parameters for Sets 1-4. Asterisks represent statistical significance assessed using a signed-rank test: \* is  $p < 0.05$ , \*\* is  $p < 0.005$ . All comparisons are not significant ( $p > 0.05$ ) unless marked with an asterisk.

## SECTION S10: CHANGING ELEMENT GROUPING

---

Here, we examine one further influence on the shape representation, namely grouping, by creating stimuli containing identical shapes but differing in their grouping status.

### METHODS

*Subjects.* Eight right-handed human subjects (6 male, aged 20-26 years) participated in the study. All other details are as in Experiment 1.

*Stimuli.* We created four sets of interior-exterior shapes each containing 25 stimuli. Each stimulus contained four identical interior shapes (Figure S8A). Sets 1 & 2 consisted of stimuli in which the local elements were identical in colour (red in Set 1, green in Set 2). Sets 3 & 4 consisted of stimuli in which two local elements were green and the other two red (Set 3: green along the main diagonal, Set 4: red along the main diagonal). Thus Sets 1-2 have local elements that group by colour and shape whereas Sets 3-4 have local elements that group by shape alone. Half of the subjects performed searches involving Sets 1 & 3 and the other half performed searches involving Sets 2 & 4. In the results, we report the combined results across Sets 1 & 2 as Grouping 1 (G1) and Sets 3 & 4 as Grouping 2 (G2).

*Procedure.* Subjects performed oddball search exactly as before, with the largest item measuring  $4.4^\circ$ . All other details are identical to Experiment 2.

### RESULTS

In this experiment, subjects performed oddball searches for interior-exterior stimuli that either contained local elements of identical colours (G1) or of different colours (G2). Figure S8A illustrates these two types of stimuli. Importantly because the colour and arrangement of the local elements was identical for the target and distractors, these could not serve as cues to guide visual search. Thus differences in search performance across sets can only be due to differences in grouping status.

Subjects were highly consistent in their performance across the two groups (split-half correlation between RT of odd- and even-numbered subjects:  $r = 0.79$  &  $0.81$  for G1 & G2 respectively,  $p < 0.00005$  in all cases). Observed dissimilarity was also extremely similar across the two sets, suggesting that the underlying shape representation is qualitatively similar across grouping status (Figure S8C). To visualize the underlying shape representation, we performed a multidimensional scaling as before on the search dissimilarities of G1 pairs. The resulting plot (Figure S8B) shows that stimuli tended to group together by their exterior shape.

For both levels of grouping, the multiscale model yielded excellent fits to the data ( $r = 0.93$  &  $0.93$  for G1 & G2,  $p < 0.00005$ ) indicating that systematic variations across grouping must be captured by systematic variations in model parameters. Indeed, when grouping is disrupted, global and across-object terms increased whereas local and within-object terms decreased (Figure S8D). Thus, in terms of decreasing local & within-object terms, disrupting grouping has the same effect as decreasing local element size (Figure S7H). However, disrupting grouping appears to increase across-object interactions, an effect opposite to that observed with decreased element size (Figure S7H) – this is difficult to reconcile with the other changes.

826 Taken together, these results show that searches for interior-exterior stimuli are  
 827 explained extremely well by the multiscale model across changes in the grouping  
 828 status of local elements, and that grouping tends to make local elements more salient.  
 829

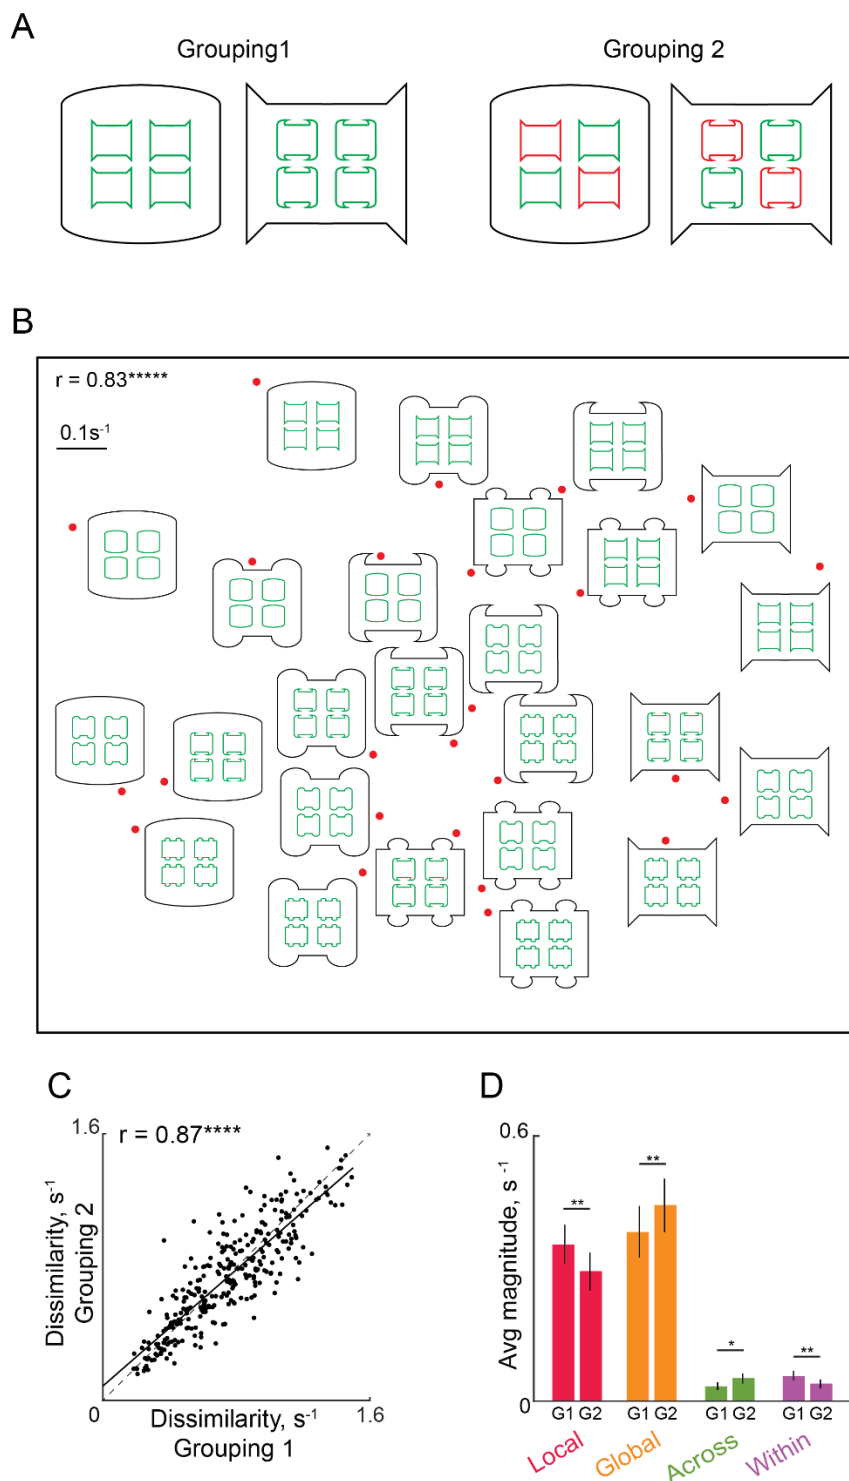

830  
 831 **Figure S8: Effect of element grouping on feature integration**  
 832 (A) Example stimuli from Sets 1&3 representing the two grouping levels (G1 & G2).  
 833 (B) Visualization of the underlying shape representation for the reference set (G1), as  
 834 obtained using multidimensional scaling. All conventions are as before.  
 835 (C) Observed dissimilarity plotted against predicted dissimilarity for set G1.

836 (D) Average magnitude of model terms for sets G1 & G2. Asterisks represent statistical  
837 significance assessed using a signed-rank test: \* is  $p < 0.05$ , \*\* is  $p < 0.005$ . All  
838 comparisons are not significant ( $p > 0.05$ ) unless marked with an asterisk.  
839

## SECTION S11. SUPPLEMENTARY REFERENCES

---

840  
841  
842  
843  
844  
845  
846  
847  
848  
849  
850  
851  
852  
853  
854  
855  
856  
857  
858  
859  
860  
861  
862  
863  
864  
865  
866  
867  
868

Baayen RH, Davidson DJ, Bates DM (2008) Mixed-effects modeling with crossed random effects for subjects and items. *J Mem Lang* 59:390–412.

Bates D, Mächler M, Bolker B, Walker S (2015) Fitting Linear Mixed-Effects Models Using lme4. *J Stat Softw* 67:1–48.

Delignette-Muller ML, Dutang C (2015) An R Package for Fitting Distributions. *J Stat Softw* 64:1–34.

Fox J, Weisberg S (2018) *An R Companion to Applied Regression*, Third. Thousand Oaks, CA: SAGE Publications Ltd.

Kuznetsova A, Brockhoff PB, Christensen RHB (2017) lmerTest Package: Tests in Linear Mixed Effects Models. *J Stat Softw* 82:1–26.

Lakens D (2013) Calculating and reporting effect sizes to facilitate cumulative science: a practical primer for t-tests and ANOVAs. *Front Psychol* 4:863.

Pramod RT, Arun SP (2014) Features in visual search combine linearly. *J Vis* 14:1–20.

Pramod RT, Arun SP (2016) Object attributes combine additively in visual search. *J Vis* 16:8.

Richardson JTE (2011) Eta squared and partial eta squared as measures of effect size in educational research. *Educ Res Rev* 6:135–147.

Sunder S, Arun SP (2016) Look before you seek: Preview adds a fixed benefit to all searches. *J Vis* 16:3.

Venables WN, Ripley BD (2002) *Modern Applied Statistics with S*, Fourth Ed. New York: Springer.

Vighneshvel T, Arun SP (2013) Does linear separability really matter? Complex visual search is explained by simple search. *J Vis* 13:1–24.

Wickham H (2009) *ggplot2: Elegant Graphics for Data Analysis*. New York, NY: Springer New York.
